# Supplementary material
Source: PubMed Central journal article supplement (PMC7199221)
Supplement: NIHMS1579908-supplement-Supplementary_Material.pdf [file NIHMS1579908-supplement-Supplementary_Material.pdf]

Fig. S1

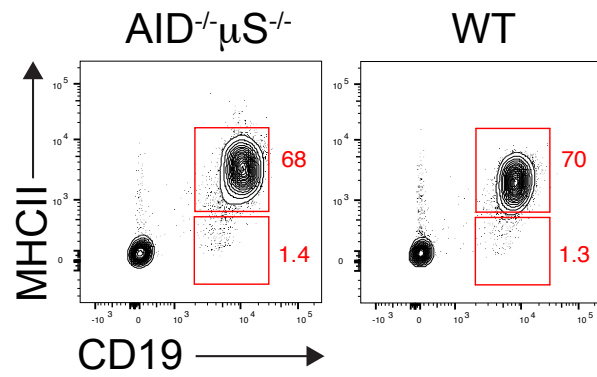

**Fig. S1.** Flow cytometry plots showing expression of MHCII on CD19<sup>+</sup> B cell in B6 (WT) and  $AID^{-/-} \times \mu S^{-/-}$  mice peripheral blood. Data shown are representative results from a single experiment with 3 mice per group.

Fig. S2

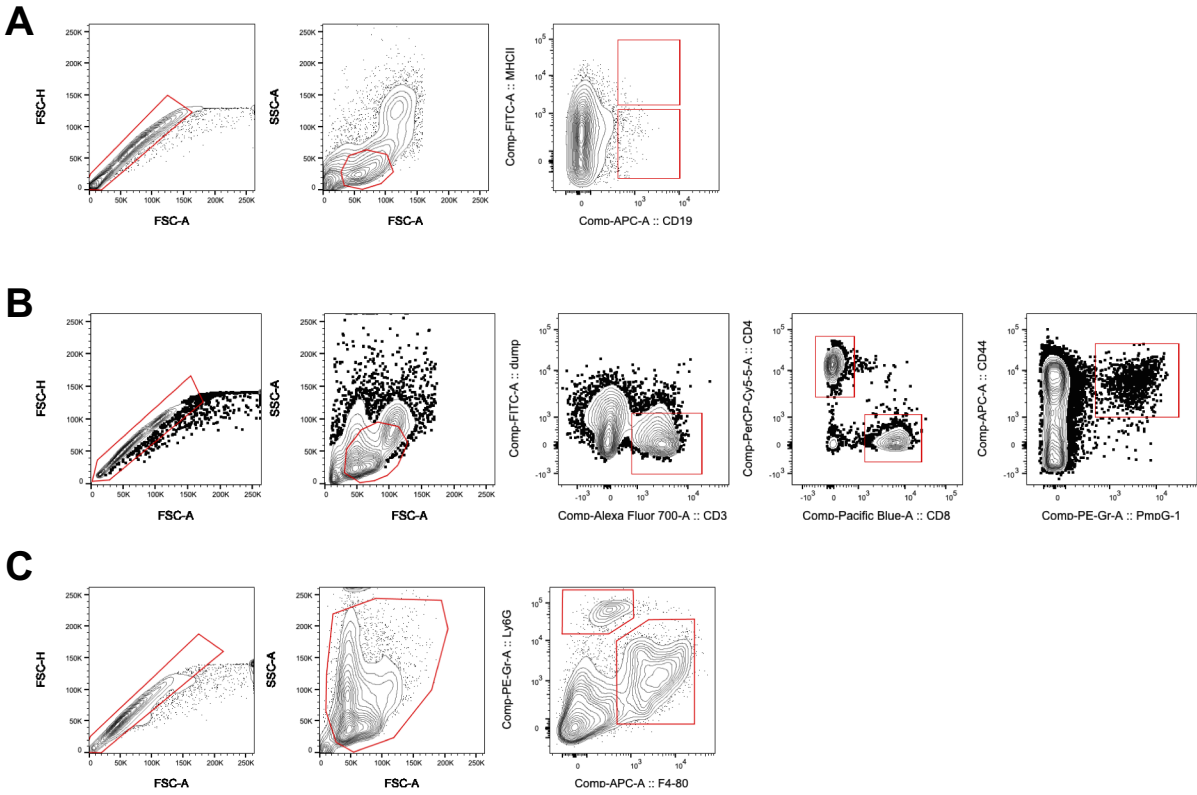

**Fig. S2.** Flow cytometry plots showing gating strategies for Fig. 1C (A), Fig. 3C (B) and Fig. 4C (C).
